# Supplementary material for: A multifunctional nanoporous layer created on glass through a simple alkali corrosion process
Source: Royal Society of Chemistry journal article supplement (doi:10.1039/c0jm01695k), 2010-01-01
Supplement: c0jm01695k.pdf [file c0jm01695k.pdf]

### Supporting Information

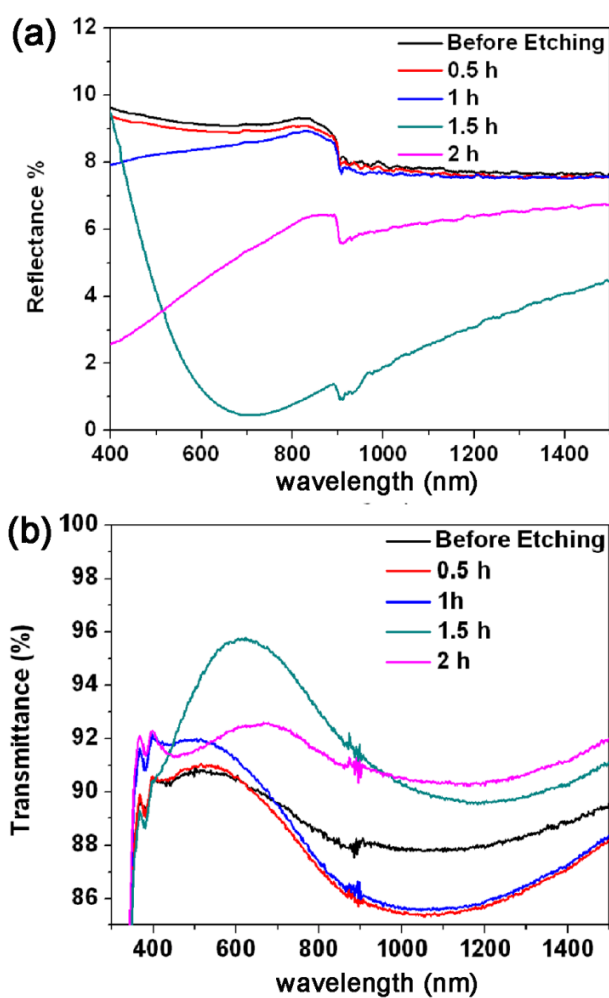

Figure S1. (a) Reflectance spectra of glass B before and after etching. (b) Transmittance spectra of glass B before and after etching..

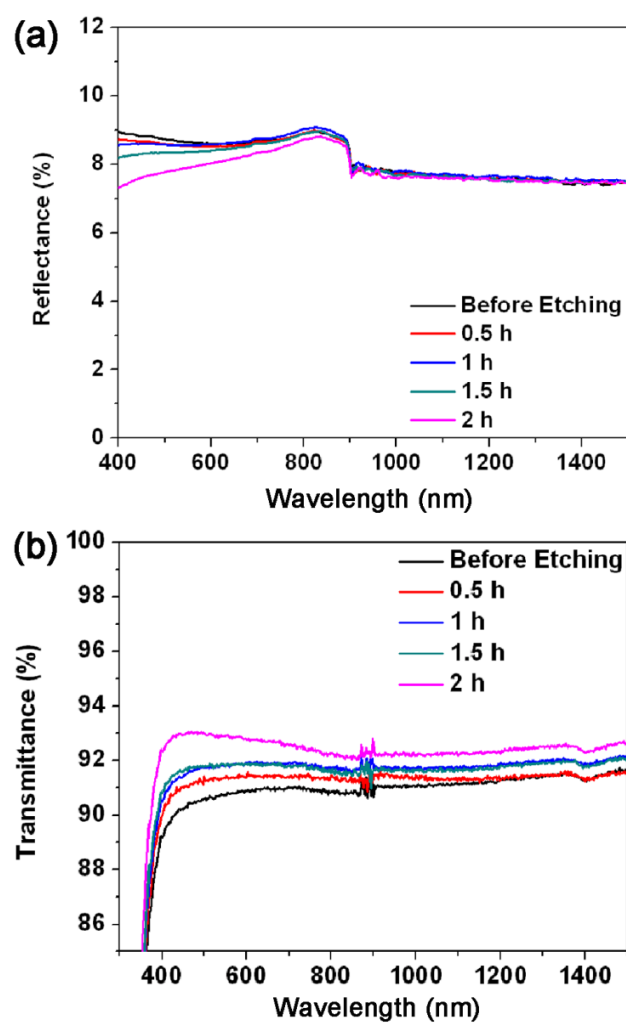

Figure S2. (a) Reflectance spectra of glass C before and after etching. (b) Transmittance spectra of glass C before and after etching.

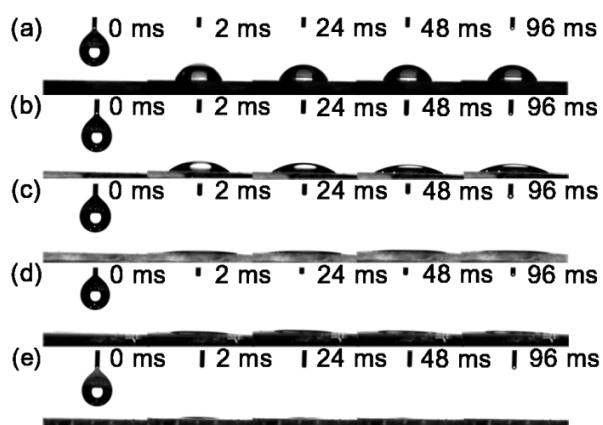

Figure S3. Dynamic CA of the unetched and etched glass B. (a) Before etching , (b) 0.5 h, (c) 1 h, (d) 2 h and (e) 4 h.

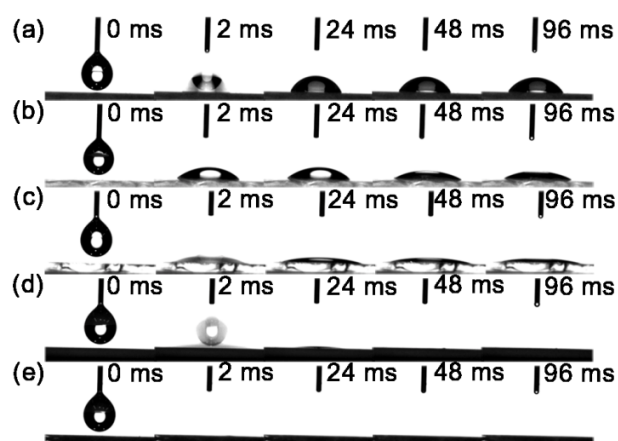

Figure S4. Dynamic CA of the unetched and etched glass C. a) Before etching, (b) 0.5 h, (c) 1 h, (d) 2 h and (e) 4 h.
